# Supplementary material
Source: publisher site journal article supplement (https://www.spandidos-publications.com/8085/downloadSupplementary)
Supplement: Supplementary file 1 [file downloadSupplementary]

## Sheet: 附表17
Table SVII. Univariate and multivariate Cox regression analysis of prognostic factors.
ID	HR	HR.95L	HR.95H	P-Value
RiskScore	3.35293	1.16905	9.61646	0.0244165
Age	1.13393	1.01773	1.26339	0.0226875
Sex	1.80934	0.277362	11.803	0.535455
T	0.0194493	0.00015003	2.52132	0.112428
N	0.0040013	2.161e-06	7.40881	0.150359
M	0.00597142	1.43937e-05	2.47733	0.0959132
Stage	132.335	0.653008	26818.4	0.0714342
Cancer_Status	12.3511	1.25806	121.257	0.0310093
